# Supplementary material
Source: Royal Society of Chemistry journal article supplement (doi:10.1039/d6ta01280a)
Supplement: d6ta01280a1.pdf [file d6ta01280a1.pdf]

## Enhanced proton uptake in triple-conducting $\text{Ba}_y\text{Sr}_{1-y}(\text{Fe}_{0.75}\text{Mo}_{0.25})_{1-2x}\text{Zr}_x\text{Zn}_x\text{O}_{3-\delta}$ perovskites

Margarita Nowakowska<sup>a</sup>, Rotraut Merkle<sup>b</sup>, Juliusz Dąbrowa<sup>a,\*</sup>, Marek Zajusz<sup>a</sup>, Konrad Świerczek<sup>c,d</sup>

<sup>a</sup>AGH University of Krakow, Faculty of Materials Science and Ceramics,

Al. Mickiewicza 30, 30-059 Krakow, Poland

<sup>b</sup>Max Planck Institute for Solid State Research, Heisenbergstraße 1, Stuttgart, DE-70569, Germany

<sup>c</sup>AGH University of Krakow, Faculty of Energy and Fuels,

Al. Mickiewicza 30, 30-059 Krakow, Poland

<sup>d</sup>AGH Centre of Energy, AGH University of Krakow,

ul. Czarnowiejska 36, 30-054 Krakow, Poland

\* - corresponding author: [dabrowa@agh.edu.pl](mailto:dabrowa@agh.edu.pl)

Table S1. Sintering conditions for all  $\text{Ba}_y\text{Sr}_{1-y}(\text{Fe}_{0.75}\text{Mo}_{0.25})_{1-2x}\text{Zr}_x\text{Zn}_x\text{O}_{3-\delta}$  compositions. The samples marked with italics were prepared according to a different methodology: The precursors were mixed in a vibrating mill and then subjected to a 3-stage calcination in a powder form, with a final temperature of 1150 °C. to be isostatically pelletized at a pressure of 200 t.

|                   |             | Ba content     |                |                                  |                                  |                                  |
|-------------------|-------------|----------------|----------------|----------------------------------|----------------------------------|----------------------------------|
|                   |             | <b>0</b>       | <b>0.25</b>    | <b>0.5</b>                       | <b>0.75</b>                      | <b>1</b>                         |
| Zn and Zr content | <b>0</b>    | 1200 °C<br>air | 1200 °C<br>air | 1150 °C<br>air                   | 1150 °C<br>air                   | 1200 °C<br>air                   |
|                   | <b>0.05</b> | 1200 °C<br>air |                | <i>1200 °C<br/>N<sub>2</sub></i> |                                  | 1200 °C<br>air                   |
|                   | <b>0.1</b>  | 1200 °C<br>air | 1200 °C<br>air | 1200 °C<br>air                   | 1200 °C<br>N <sub>2</sub>        | 1200 °C<br>N <sub>2</sub>        |
|                   | <b>0.15</b> | 1200 °C<br>air |                | <i>1200 °C<br/>air</i>           |                                  | 1250 °C<br>N <sub>2</sub>        |
|                   | <b>0.2</b>  | 1200 °C<br>air | 1200 °C<br>air | <i>1200 °C<br/>air</i>           | <i>1150 °C<br/>N<sub>2</sub></i> | <i>1150 °C<br/>N<sub>2</sub></i> |

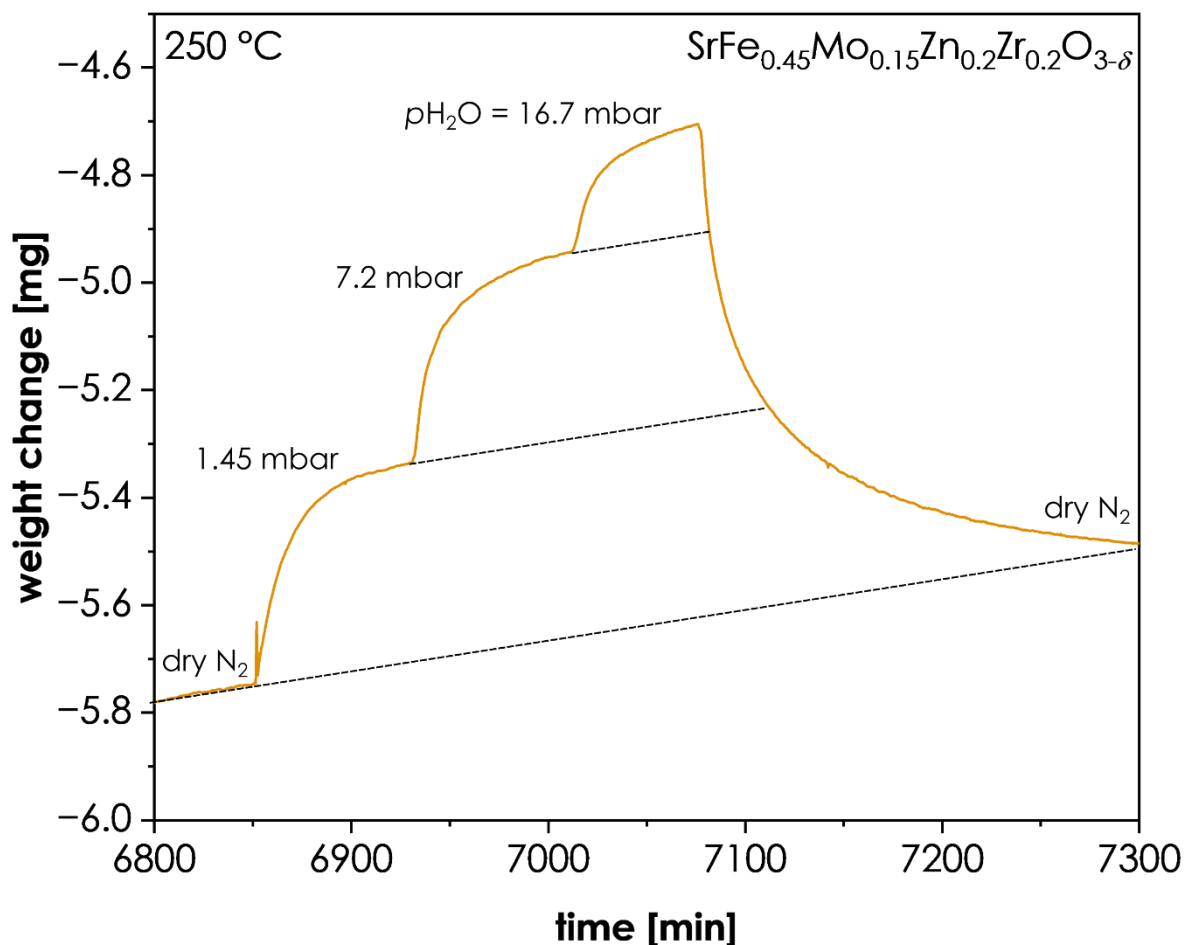

Fig. S1. Weight changes of  $\text{SrFe}_{0.45}\text{Mo}_{0.15}\text{Zn}_{0.2}\text{Zr}_{0.2}\text{O}_{3-\delta}$  at  $250\text{ }^{\circ}\text{C}$  in dry conditions and in three different  $p_{\text{H}_2\text{O}}$ : 1.45, 7.2 and 16.7 mbar.

The samples were quenched from  $700\text{ }^{\circ}\text{C}$  in  $\text{N}_2$  (with a residual  $\text{O}_2$  content of approximately 100 ppm in the TG setup). As a result, at lower temperatures the oxygen stoichiometry is not at equilibrium and there remains a thermodynamic driving force for oxygen incorporation into the lattice. However, due to the combined effect of low temperature and low  $p_{\text{O}_2}$ , the kinetics of this oxidation process are slow. Although not negligible, this results in an approximately linear increase in sample mass over time. A similar slope is observed across plateaus at different  $p_{\text{H}_2\text{O}}$  values, as now indicated by dashed lines in Fig. S1. Water uptake upon changes in  $p_{\text{H}_2\text{O}}$  is therefore evaluated relative to this baseline.

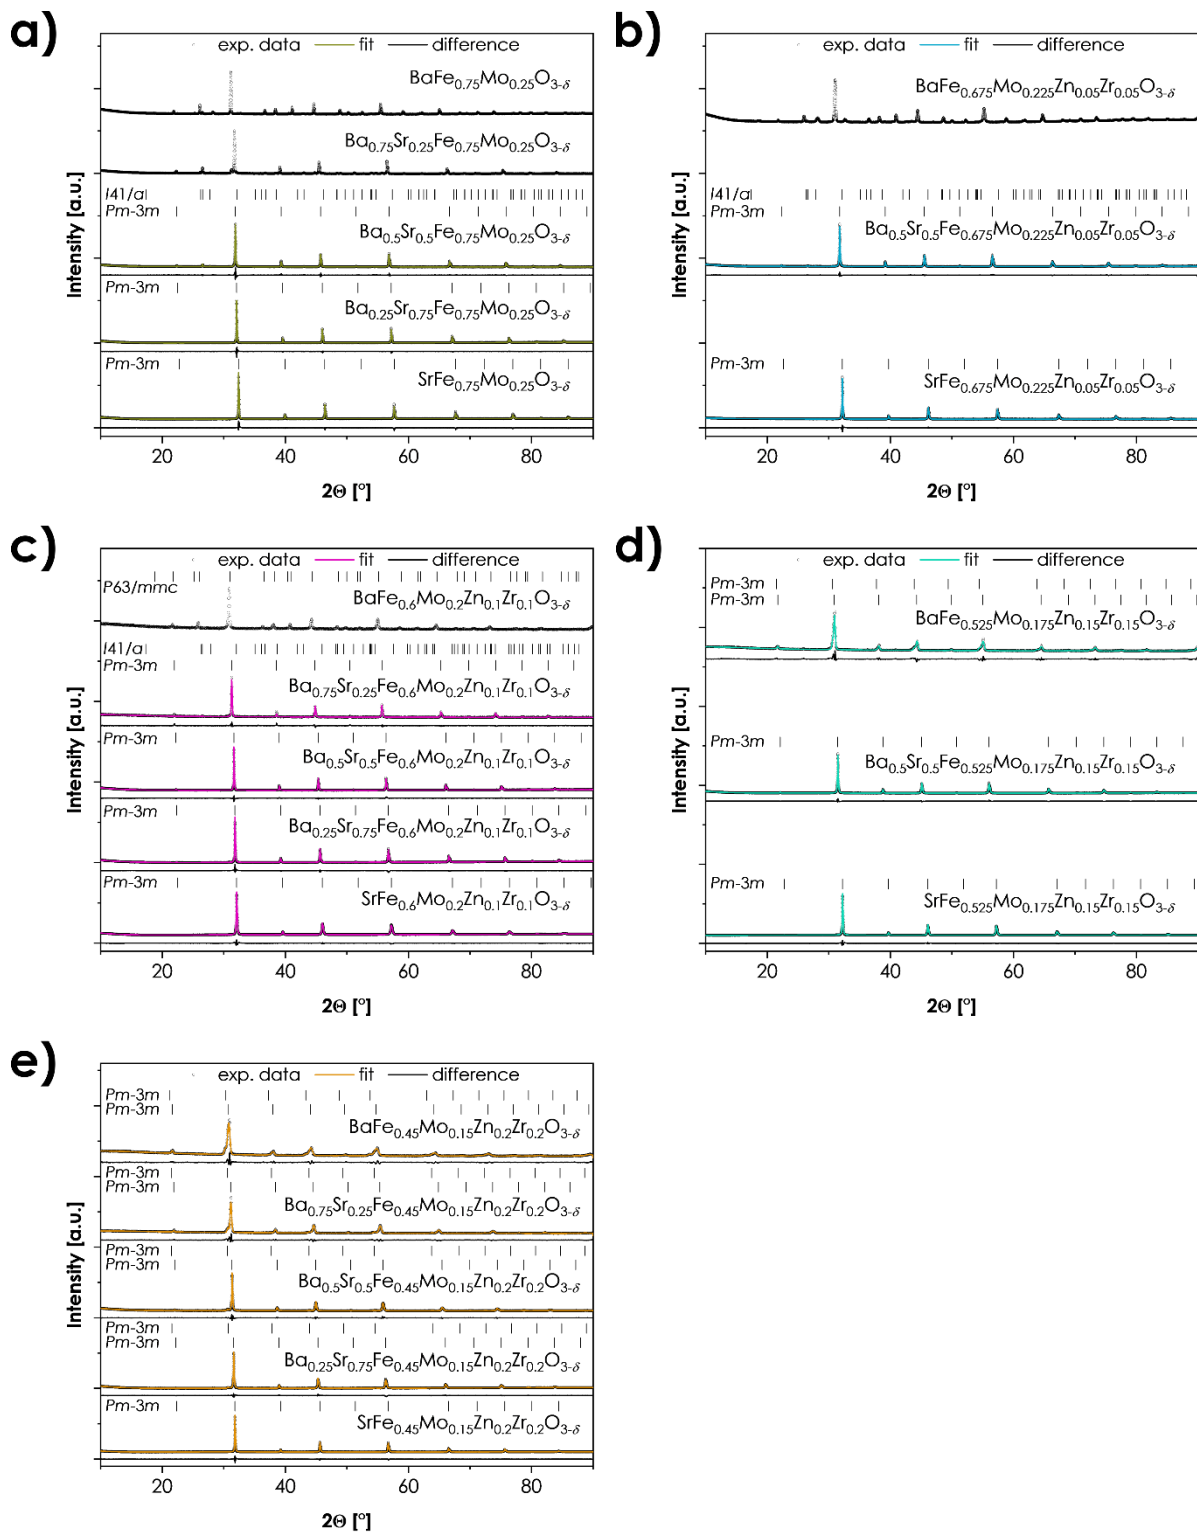

Fig. S2. X-ray diffractograms for  $\text{Ba}_y\text{Sr}_{1-y}(\text{Fe}_{0.75}\text{Mo}_{0.25})_{1-2x}\text{Zr}_x\text{Zn}_x\text{O}_{3-\delta}$  compositions measured before TG measurements.

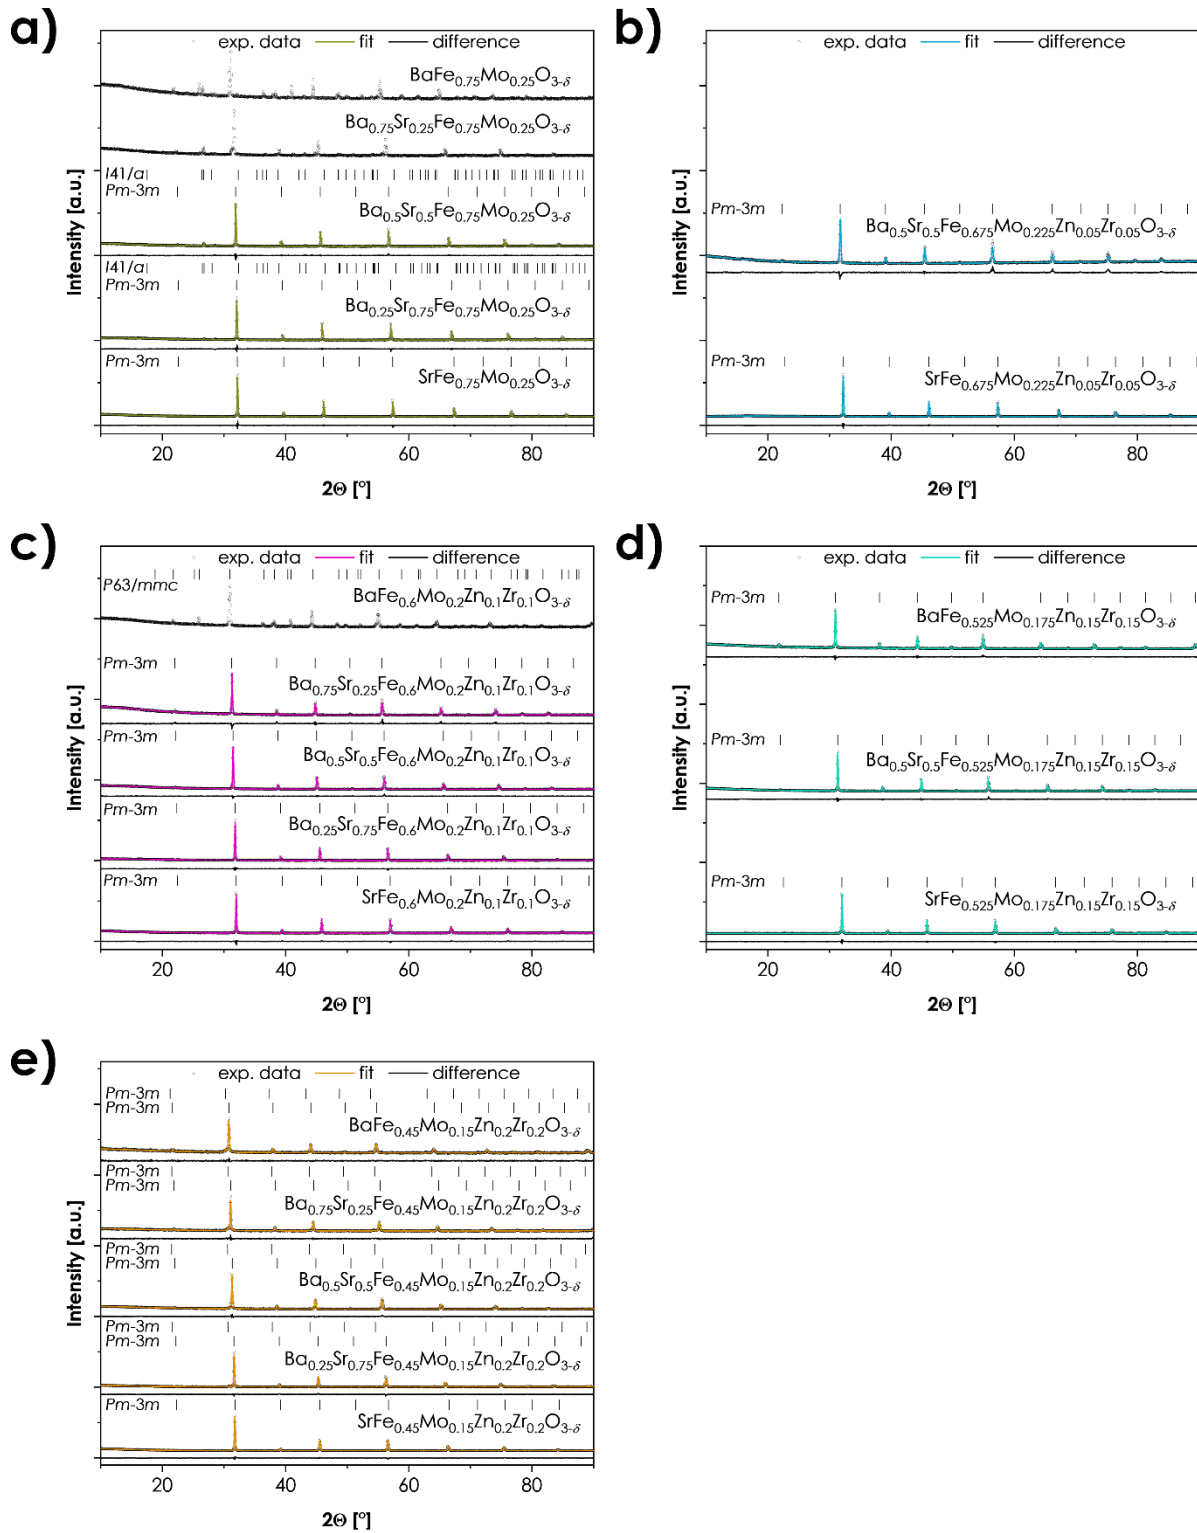

Fig. S3. X-ray diffractograms for  $\text{Ba}_y\text{Sr}_{1-y}(\text{Fe}_{0.75}\text{Mo}_{0.25})_{1-2x}\text{Zr}_x\text{Zn}_x\text{O}_{3-\delta}$  compositions measured after TG measurements.

Table S2. The results of Rietveld refinement for  $\text{Ba}_y\text{Sr}_{1-y}(\text{Fe}_{0.75}\text{Mo}_{0.25})_{1-2x}\text{Zn}_x\text{Zr}_x\text{O}_{3-\delta}$  ( $x \leq 0.2$ ;  $y \leq 1$ ) samples (before TG measurements).

| Composition                                                                                                           | Space group        | Content [wt. %] | $a$ [Å]                 | $c$ [Å]      | GoF [-] | Rwp [%] |
|-----------------------------------------------------------------------------------------------------------------------|--------------------|-----------------|-------------------------|--------------|---------|---------|
| $\text{SrFe}_{0.75}\text{Mo}_{0.25}\text{O}_{3-\delta}$                                                               | $Pm-3m$            | 100             | 3.9188(1)               |              | 1.29    | 3.34    |
| $\text{Ba}_{0.25}\text{Sr}_{0.75}\text{Fe}_{0.75}\text{Mo}_{0.25}\text{O}_{3-\delta}$                                 | $Pm-3m$            | 100             | 3.9425(1)               |              | 1.86    | 3.29    |
| $\text{Ba}_{0.5}\text{Sr}_{0.5}\text{Fe}_{0.75}\text{Mo}_{0.25}\text{O}_{3-\delta}$                                   | $Pm-3m$<br>$I41/a$ | 95.6<br>4.4     | 3.9620(1)<br>5.5521(11) | 12.8321(23)  | 2.10    | 4.24    |
| $\text{Ba}_{0.75}\text{Sr}_{0.25}\text{Fe}_{0.75}\text{Mo}_{0.25}\text{O}_{3-\delta}$                                 | -                  | -               | -                       |              | -       | -       |
| $\text{BaFe}_{0.75}\text{Mo}_{0.25}\text{O}_{3-\delta}$                                                               | -                  | -               | -                       |              | -       | -       |
| $\text{SrFe}_{0.675}\text{Mo}_{0.225}\text{Zn}_{0.05}\text{Zr}_{0.05}\text{O}_{3-\delta}$                             | $Pm-3m$            | 100             | 3.9292(1)               |              | 1.72    | 2.21    |
| $\text{Ba}_{0.5}\text{Sr}_{0.5}\text{Fe}_{0.675}\text{Mo}_{0.225}\text{Zn}_{0.05}\text{Zr}_{0.05}\text{O}_{3-\delta}$ | $Pm-3m$<br>$I41/a$ | 98.8<br>1.2     | 3.9819(1)<br>5.5605(19) | 12.8056(42)  | 1.78    | 2.70    |
| $\text{BaFe}_{0.675}\text{Mo}_{0.225}\text{Zn}_{0.05}\text{Zr}_{0.05}\text{O}_{3-\delta}$                             | -                  | -               | -                       |              | -       | -       |
| $\text{SrFe}_{0.6}\text{Mo}_{0.2}\text{Zn}_{0.1}\text{Zr}_{0.1}\text{O}_{3-\delta}$                                   | $Pm-3m$            | 100             | 3.9393(1)               |              | 2.45    | 2.75    |
| $\text{Ba}_{0.25}\text{Sr}_{0.75}\text{Fe}_{0.6}\text{Mo}_{0.2}\text{Zn}_{0.1}\text{Zr}_{0.1}\text{O}_{3-\delta}$     | $Pm-3m$            | 100             | 3.9693(1)               |              | 1.84    | 3.35    |
| $\text{Ba}_{0.5}\text{Sr}_{0.5}\text{Fe}_{0.6}\text{Mo}_{0.2}\text{Zn}_{0.1}\text{Zr}_{0.1}\text{O}_{3-\delta}$       | $Pm-3m$            | 100             | 3.9969(1)               |              | 1.60    | 3.19    |
| $\text{Ba}_{0.75}\text{Sr}_{0.25}\text{Fe}_{0.6}\text{Mo}_{0.2}\text{Zn}_{0.1}\text{Zr}_{0.1}\text{O}_{3-\delta}$     | $Pm-3m$<br>$I41/a$ | 98.3<br>1.7     | 4.0396(1)<br>5.5779(89) | 12.7913(185) | 1.28    | 6.68    |
| $\text{BaFe}_{0.6}\text{Mo}_{0.2}\text{Zn}_{0.1}\text{Zr}_{0.1}\text{O}_{3-\delta}$                                   | -                  | -               | -                       |              | -       | -       |
| $\text{SrFe}_{0.525}\text{Mo}_{0.175}\text{Zn}_{0.15}\text{Zr}_{0.15}\text{O}_{3-\delta}$                             | $Pm-3m$            | 100             | 3.9564(1)               |              | 2.15    | 2.92    |
| $\text{Ba}_{0.5}\text{Sr}_{0.5}\text{Fe}_{0.525}\text{Mo}_{0.175}\text{Zn}_{0.15}\text{Zr}_{0.15}\text{O}_{3-\delta}$ | $Pm-3m$            | 100             | 4.0164(1)               |              | 1.82    | 2.80    |
| $\text{BaFe}_{0.525}\text{Mo}_{0.175}\text{Zn}_{0.15}\text{Zr}_{0.15}\text{O}_{3-\delta}$                             | $Pm-3m$<br>$Pm-3m$ | 81.0<br>19.0    | 4.0818(3)<br>4.1185(6)  |              | 3.12    | 6.20    |
| $\text{SrFe}_{0.45}\text{Mo}_{0.15}\text{Zn}_{0.2}\text{Zr}_{0.2}\text{O}_{3-\delta}$                                 | $Pm-3m$            | 100             | 3.9712(1)               |              | 2.08    | 3.04    |
| $\text{Ba}_{0.25}\text{Sr}_{0.75}\text{Fe}_{0.45}\text{Mo}_{0.15}\text{Zn}_{0.2}\text{Zr}_{0.2}\text{O}_{3-\delta}$   | $Pm-3m$<br>$Pm-3m$ | 97.6<br>2.4     | 3.9984(1)<br>4.1149(6)  |              | 1.47    | 2.82    |
| $\text{Ba}_{0.5}\text{Sr}_{0.5}\text{Fe}_{0.45}\text{Mo}_{0.15}\text{Zn}_{0.2}\text{Zr}_{0.2}\text{O}_{3-\delta}$     | $Pm-3m$<br>$Pm-3m$ | 95.7<br>4.3     | 4.0276(1)<br>4.1225(6)  |              | 1.80    | 3.71    |
| $\text{Ba}_{0.75}\text{Sr}_{0.25}\text{Fe}_{0.45}\text{Mo}_{0.15}\text{Zn}_{0.2}\text{Zr}_{0.2}\text{O}_{3-\delta}$   | $Pm-3m$<br>$Pm-3m$ | 89.7<br>10.3    | 4.0646(3)<br>4.1271(7)  |              | 2.52    | 5.43    |
| $\text{BaFe}_{0.45}\text{Mo}_{0.15}\text{Zn}_{0.2}\text{Zr}_{0.2}\text{O}_{3-\delta}$                                 | $Pm-3m$<br>$Pm-3m$ | 86.1<br>13.9    | 4.1003(5)<br>4.1707(12) |              | 2.44    | 5.82    |

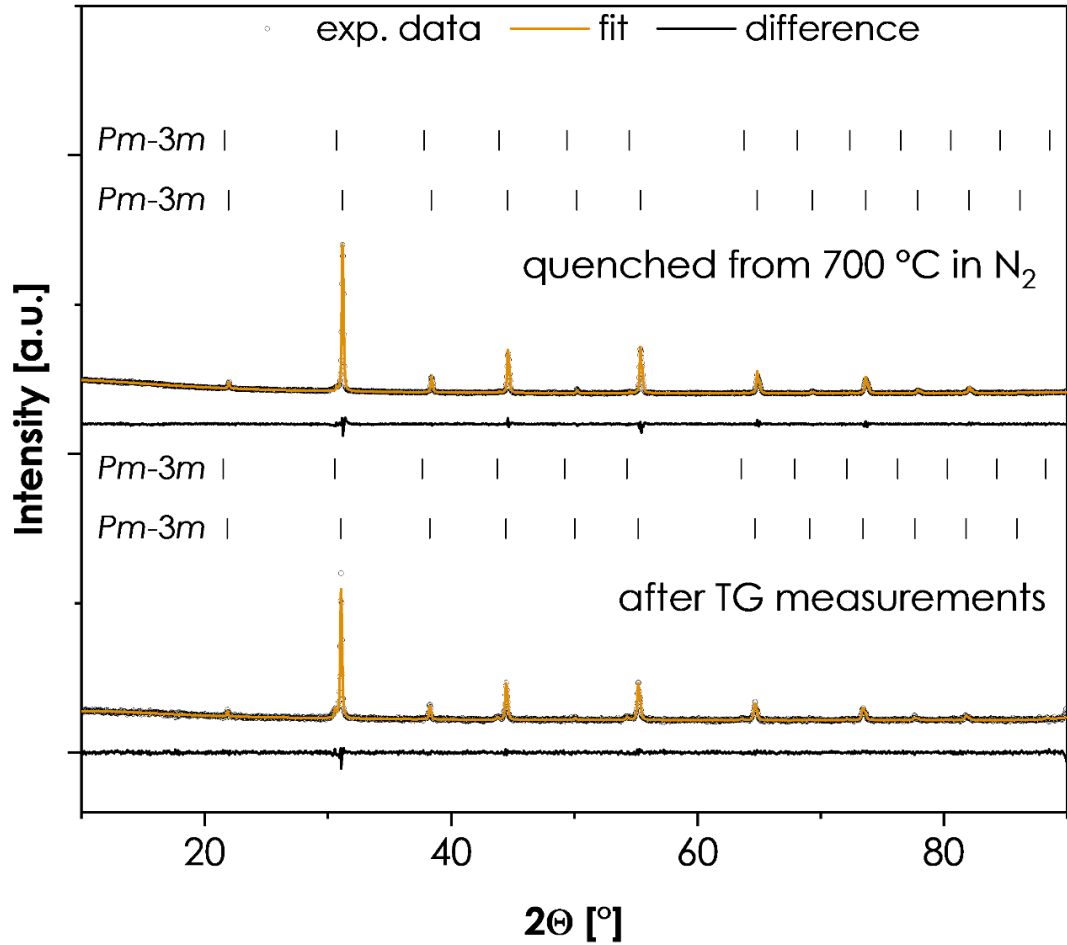

Fig. 4. Comparison of X-ray diffractograms measured for sample  $\text{Ba}_{0.75}\text{Sr}_{0.25}\text{Fe}_{0.45}\text{Mo}_{0.15}\text{Zn}_{0.2}\text{Zr}_{0.2}\text{O}_{3-\delta}$  after TG measurement (in  $\text{N}_2$  with different  $\text{pH}_2\text{O}$ ) and for sample quenched from 700 °C in  $\text{N}_2$ .

Table 3. The results of Rietveld refinement for sample  $\text{Ba}_{0.75}\text{Sr}_{0.25}\text{Fe}_{0.45}\text{Mo}_{0.15}\text{Zn}_{0.2}\text{Zr}_{0.2}\text{O}_{3-\delta}$  after TG measurement (in  $\text{N}_2$  with different  $\text{pH}_2\text{O}$ ) and for sample quenched from 700 °C in  $\text{N}_2$ .

| Conditions                           | Space group  | Content [wt.%] | $a$ [Å]    | $c$ [Å] | GoF [-] | Rwp [%] |
|--------------------------------------|--------------|----------------|------------|---------|---------|---------|
| after TG measurements                | <i>Pm-3m</i> | 94.8           | 4.0776(2)  |         | 1.02    | 6.70    |
|                                      | <i>Pm-3m</i> | 5.2            | 4.1409(11) |         |         |         |
| quenched from 700 °C in $\text{N}_2$ | <i>Pm-3m</i> | 98.8           | 4.0692(1)  |         | 1.44    | 3.10    |
|                                      | <i>Pm-3m</i> | 1.2            | 4.1320(7)  |         |         |         |

Table S4. Full data of proton concentrations of  $Ba_ySr_{1-y}(Fe_{0.75}Mo_{0.25})_{1-2x}Zn_xZr_xO_{3-\delta}$  series.

| Composition                                                          | 700 °C  | 600 °C  | 500 °C  | 450 °C  | 400 °C  | 350 °C  | 300 °C  | 250 °C  | 200 °C   | 175 °C   | 150 °C   |
|----------------------------------------------------------------------|---------|---------|---------|---------|---------|---------|---------|---------|----------|----------|----------|
| $SrFe_{0.75}Mo_{0.25}O_{3-\delta}$                                   | 0.02402 | 0.00801 | 0.04003 | 0.02402 | 0.04483 | 0.03042 | 0.04003 | 0.04964 | 0.05444  | 0.06885  | 0.09447  |
| $Ba_{0.25}Sr_{0.75}Fe_{0.75}Mo_{0.25}O_{3-\delta}$                   | 0.02551 | 0.02892 | 0.03402 | 0.01361 | 0.03572 | 0.03742 | 0.03232 | 0.05613 | 0.08165  | 0.12077  | 0.16840  |
| $Ba_{0.5}Sr_{0.5}Fe_{0.75}Mo_{0.25}O_{3-\delta}$                     | 0.01094 | 0.05471 | 0.07221 | 0.08096 | 0.10722 | 0.12910 | 0.19694 | 0.28447 | 0.48140  | 0.70022  | 0.95187  |
| $Ba_{0.75}Sr_{0.25}Fe_{0.75}Mo_{0.25}O_{3-\delta}$                   | 0.11998 | 0.20373 | 0.27164 | 0.33955 | 0.47538 | 0.70175 | 1.12053 | 1.70909 | 2.79567  | 3.81433  | 5.14991  |
| $BaFe_{0.75}Mo_{0.25}O_{3-\delta}$                                   | 0.38111 | 0.61373 | 0.96514 | 1.32398 | 1.81892 | 2.31387 | 3.10578 | 4.44213 | 4.68960  | 4.31839  | 2.31387  |
| $SrFe_{0.675}Mo_{0.225}Zn_{0.05}Zr_{0.05}O_{3-\delta}$               | 0.06217 | 0.05751 | 0.06373 | 0.06839 | 0.09170 | 0.10725 | 0.10103 | 0.15854 | 0.27822  | 0.32485  | 0.44297  |
| $Ba_{0.5}Sr_{0.5}Fe_{0.675}Mo_{0.225}Zn_{0.05}Zr_{0.05}O_{3-\delta}$ | 0.09260 | 0.22636 | 0.42185 | 0.51445 | 0.79225 | 1.26554 | 1.88287 | 2.97350 | 4.53742  | 5.71036  | 6.73925  |
| $BaFe_{0.675}Mo_{0.225}Zn_{0.05}Zr_{0.05}O_{3-\delta}$               | 0.28439 | 0.48915 | 0.89867 | 1.30818 | 1.55845 | 1.78596 | 1.78596 | 1.53569 | 0.78491  |          | 0.28439  |
| $SrFe_{0.6}Mo_{0.2}Zn_{0.1}Zr_{0.1}O_{3-\delta}$                     | 0.05963 | 0.07252 | 0.10314 | 0.09186 | 0.12892 | 0.18049 | 0.23368 | 0.45929 | 0.82995  | 1.00722  | 1.50681  |
| $Ba_{0.25}Sr_{0.75}Fe_{0.6}Mo_{0.2}Zn_{0.1}Zr_{0.1}O_{3-\delta}$     | 0.12282 | 0.10703 | 0.13685 | 0.19475 | 0.25265 | 0.34564 | 0.46495 | 0.74567 | 1.28958  | 1.55276  | 2.14930  |
| $Ba_{0.5}Sr_{0.5}Fe_{0.6}Mo_{0.2}Zn_{0.1}Zr_{0.1}O_{3-\delta}$       | 0.11401 | 0.12889 | 0.20159 | 0.31230 | 0.42136 | 0.61303 | 0.91707 | 1.44584 | 2.15636  | 2.93298  | 3.77570  |
| $Ba_{0.75}Sr_{0.25}Fe_{0.6}Mo_{0.2}Zn_{0.1}Zr_{0.1}O_{3-\delta}$     | 0.12441 | 0.20735 | 0.27647 | 0.42853 | 0.64971 | 0.94000 | 1.46530 | 2.25324 | 3.16559  | 3.82912  | 4.13324  |
| $BaFe_{0.6}Mo_{0.2}Zn_{0.1}Zr_{0.1}O_{3-\delta}$                     | 0.26285 | 0.47140 | 0.66691 | 1.05142 | 1.27517 | 1.66185 | 2.33527 | 2.24838 | 1.77046  | 1.31427  | 0.81463  |
| $SrFe_{0.525}Mo_{0.175}Zn_{0.15}Zr_{0.15}O_{3-\delta}$               | 0.12104 | 0.09346 | 0.13177 | 0.17467 | 0.23595 | 0.41215 | 0.57915 | 0.94993 | 1.60110  | 1.95349  | 2.44378  |
| $Ba_{0.5}Sr_{0.5}Fe_{0.525}Mo_{0.175}Zn_{0.15}Zr_{0.15}O_{3-\delta}$ | 0.13749 | 0.26353 | 0.45831 | 0.61872 | 0.83641 | 1.38638 | 2.02801 | 2.80714 | 3.33419  | 2.78422  | 2.41757  |
| $BaFe_{0.525}Mo_{0.175}Zn_{0.15}Zr_{0.15}O_{3-\delta}$               | 0.37853 | 0.54677 | 0.85520 | 1.27580 | 1.80855 | 2.76189 | 4.02367 | 5.11721 | 6.51918  | 5.67800  | 6.65938  |
| $SrFe_{0.45}Mo_{0.15}Zn_{0.2}Zr_{0.2}O_{3-\delta}$                   | 0.12875 | 0.13795 | 0.24830 | 0.35314 | 0.47454 | 0.68974 | 1.07599 | 1.51742 | 1.86689  | 1.97724  | 2.25314  |
| $Ba_{0.25}Sr_{0.75}Fe_{0.45}Mo_{0.15}Zn_{0.2}Zr_{0.2}O_{3-\delta}$   | 0.09260 | 0.22636 | 0.42185 | 0.51445 | 0.79225 | 1.26554 | 1.88287 | 2.97350 | 4.53742  | 5.71036  | 6.73925  |
| $Ba_{0.5}Sr_{0.5}Fe_{0.45}Mo_{0.15}Zn_{0.2}Zr_{0.2}O_{3-\delta}$     | 0.26651 | 0.40951 | 0.71502 | 1.24586 | 1.52753 | 1.98254 | 3.08757 | 4.21426 | 4.12759  | 3.62925  | 3.30424  |
| $Ba_{0.75}Sr_{0.25}Fe_{0.45}Mo_{0.15}Zn_{0.2}Zr_{0.2}O_{3-\delta}$   | 0.33458 | 0.68677 | 1.14461 | 1.35593 | 1.98987 | 3.01122 | 4.17344 | 5.68785 | 7.83621  | 9.35062  | 11.35810 |
| $BaFe_{0.45}Mo_{0.15}Zn_{0.2}Zr_{0.2}O_{3-\delta}$                   | 0.38015 | 0.72028 | 1.34052 | 2.02078 | 3.02117 | 4.34168 | 6.50252 | 8.98348 | 12.70492 | 14.70570 | 16.30632 |

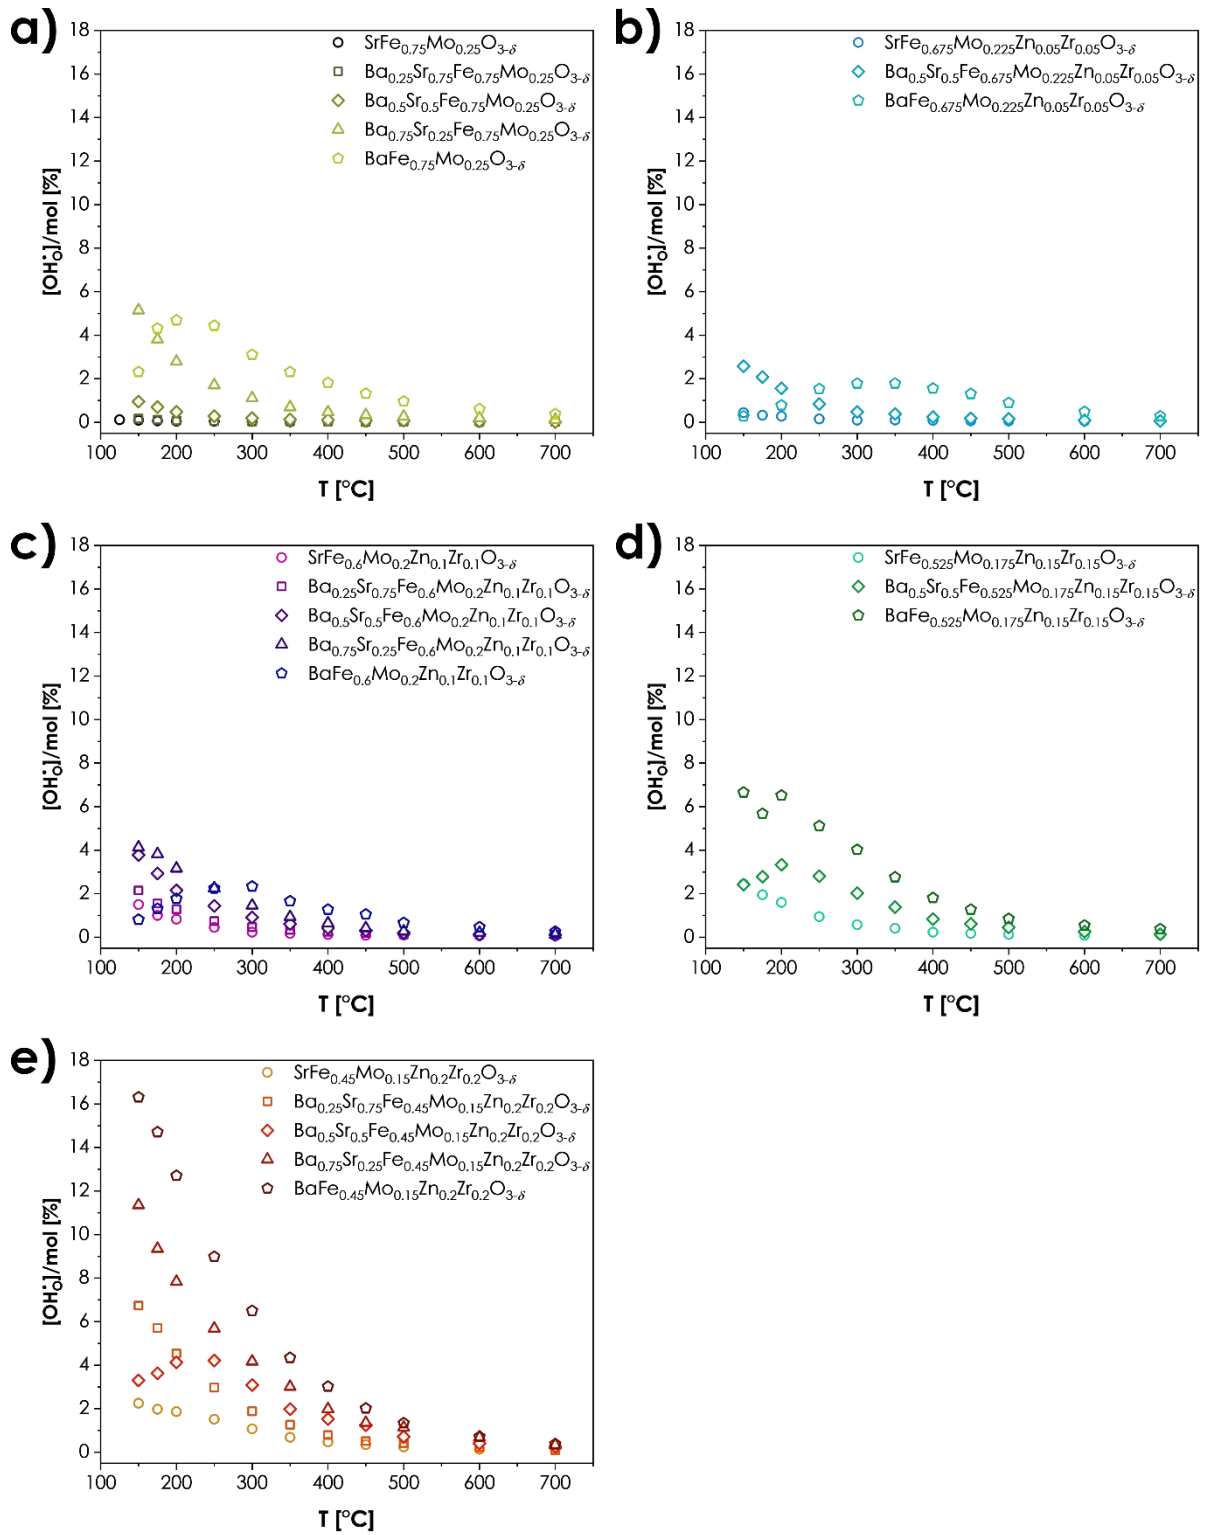

Fig. S5. Protonic defects concentration of  $\text{Ba}_y\text{Sr}_{1-y}(\text{Fe}_{0.75}\text{Mo}_{0.25})_{1-2x}\text{Zn}_x\text{Zr}_x\text{O}_{3-\delta}$  series as a function of temperature.

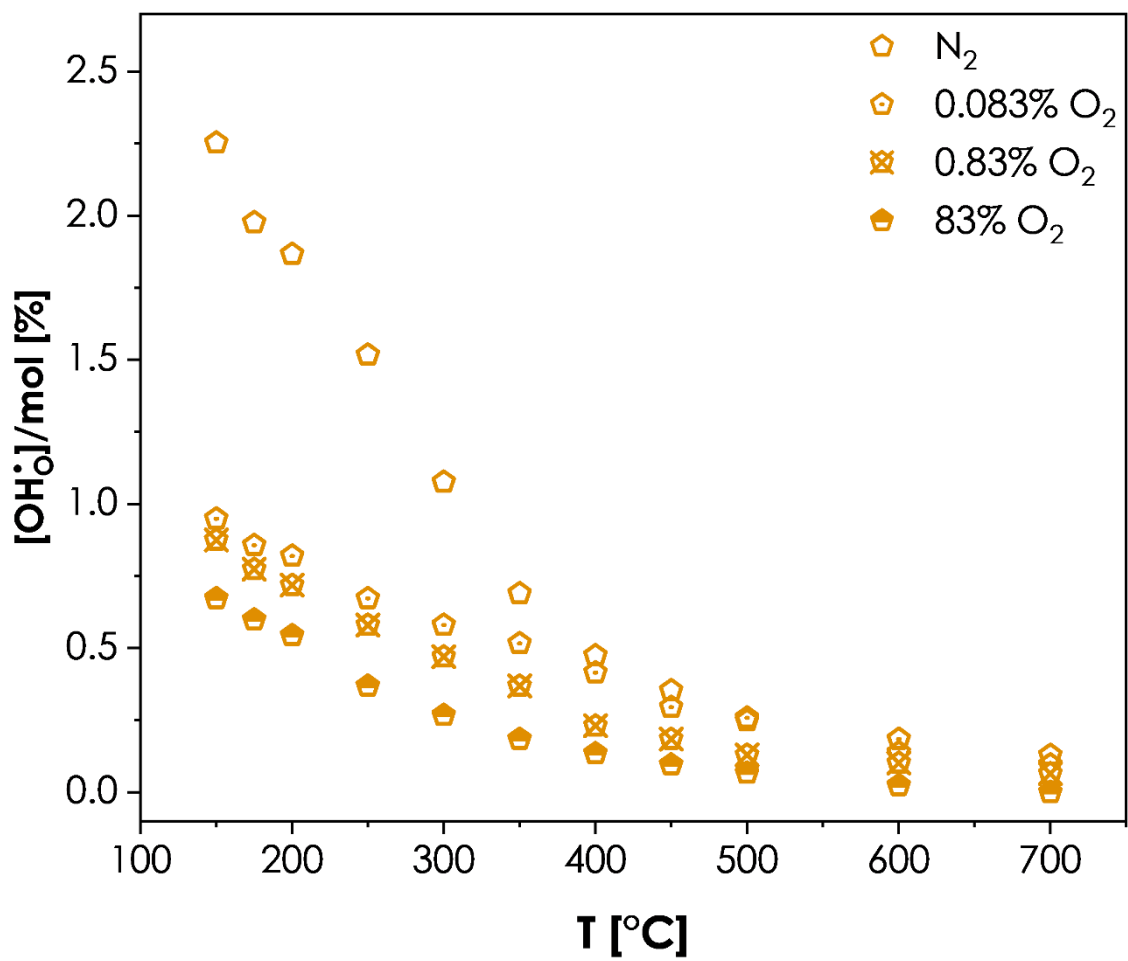

Fig. S6. Equilibrated proton concentration as a function of temperature under different values of  $p\text{O}_2$  for  $\text{SrFe}_{0.45}\text{Mo}_{0.15}\text{Zn}_{0.2}\text{Zr}_{0.2}\text{O}_{3-\delta}$  composition.

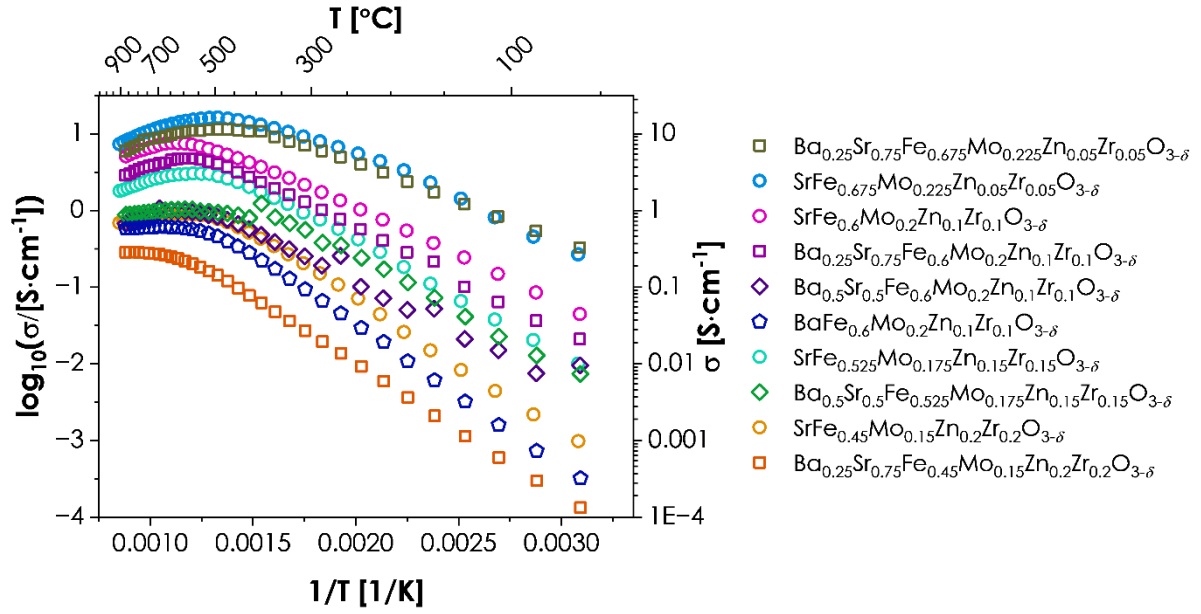

Fig. S7. Total electrical conductivity values in dry air for selected, single-phase compositions, as a function of temperature. Presented in Arrhenius coordinates.

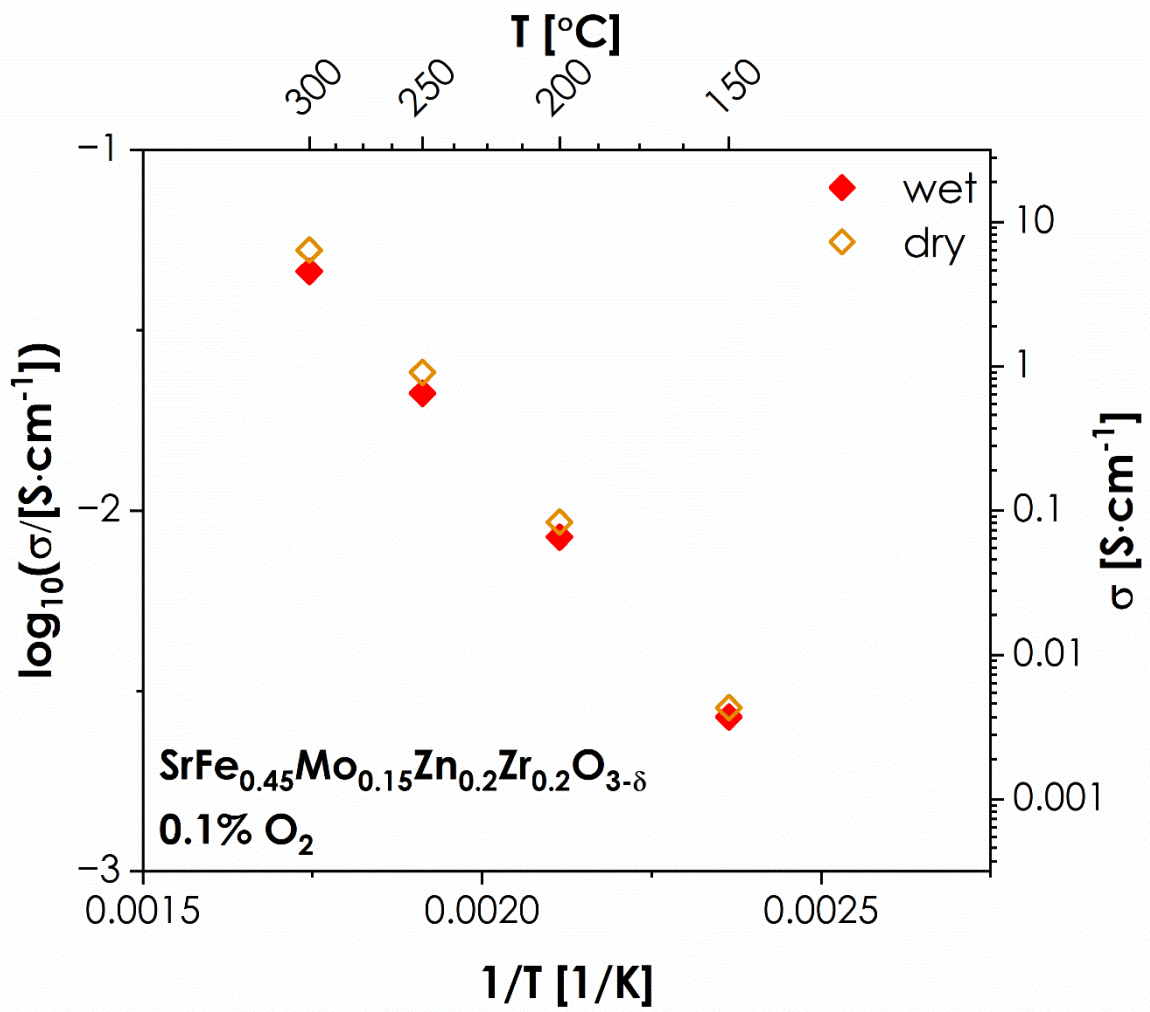

Fig. S8. Total electrical conductivity for SrFe<sub>0.45</sub>Mo<sub>0.15</sub>Zn<sub>0.2</sub>Zr<sub>0.2</sub>O<sub>3-δ</sub> composition under dry and humid (*p*H<sub>2</sub>O of 20 mbar) conditions.

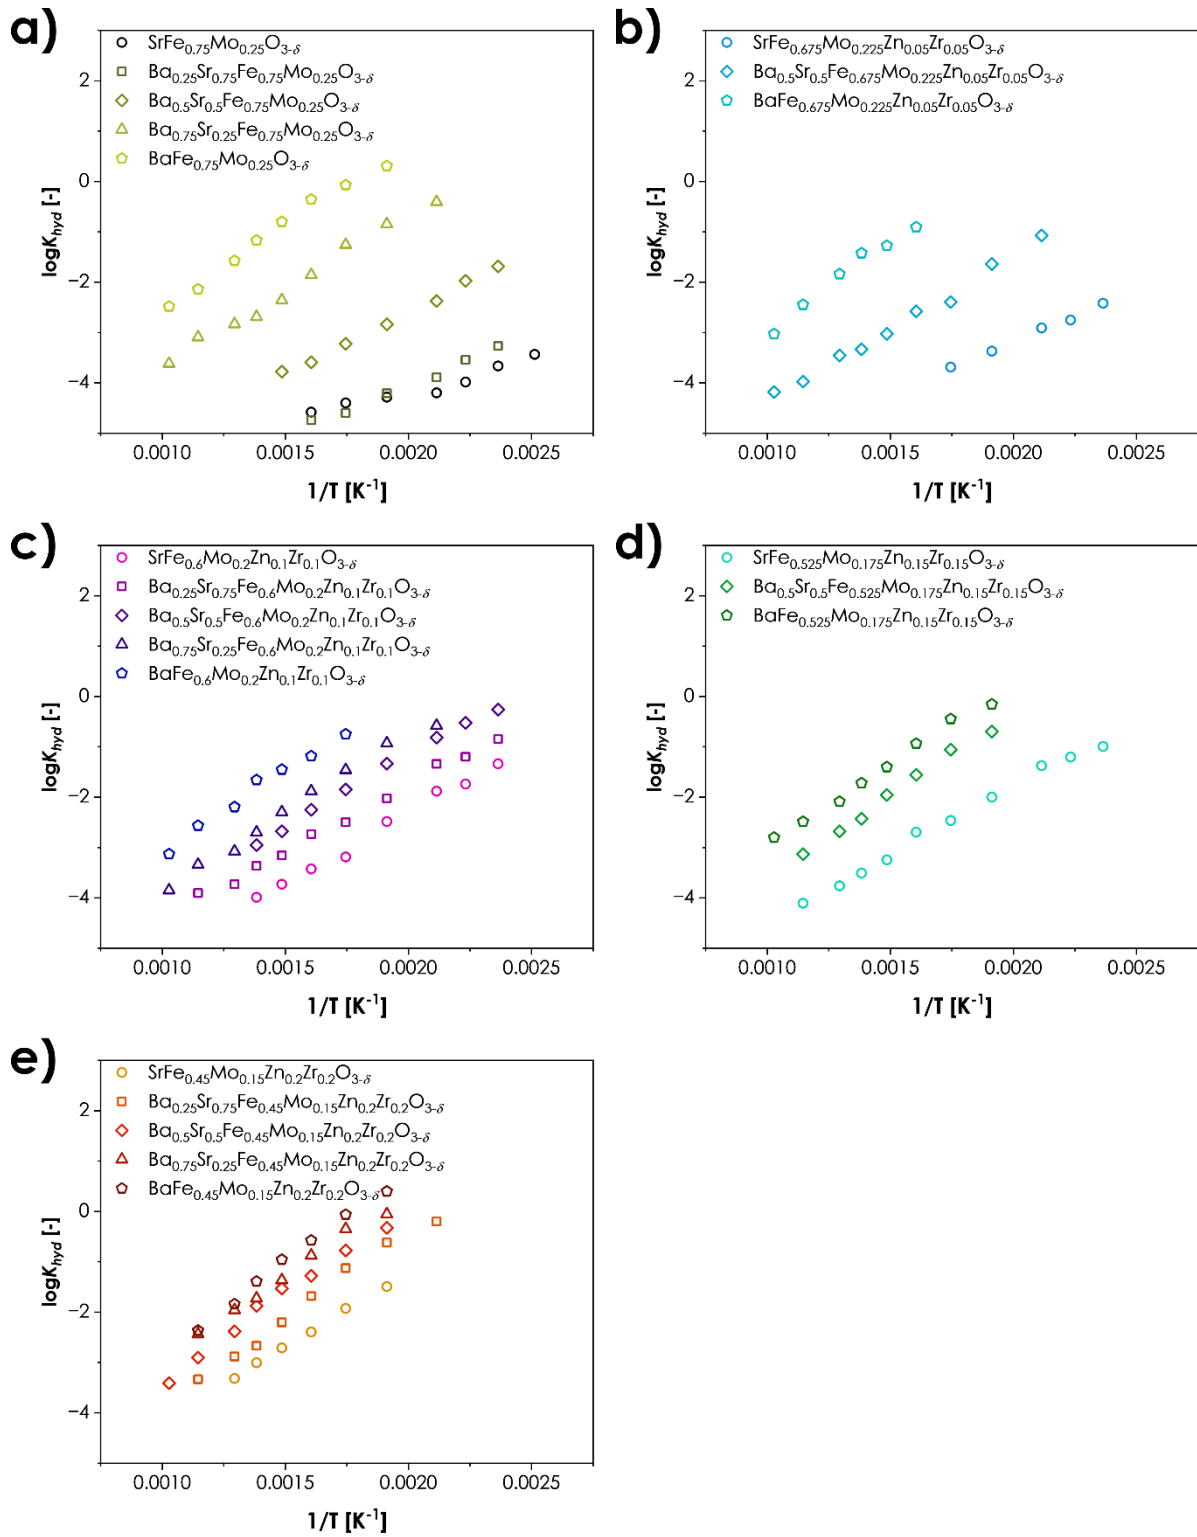

Fig. S9. Van't Hoff plots of  $K_{hyd}$  according to the hydration reaction. The different linear ranges were selected because of low data quality at high temperatures (due to the noise) and interactions between defects at low temperatures.
